# Supplementary material for: Enhanced immunofluorescence detection of a protein marker using a PAA modified ZnO nanorod array-based microfluidic device
Source: Royal Society of Chemistry journal article supplement (doi:10.1039/c8nr05116j), 2018-01-01
Supplement: c8nr05116j1.pdf [file c8nr05116j1.pdf]

## Supporting Information

### Enhanced immunofluorescence detection of protein marker using PAA modified ZnO nanorod array-based microfluidic device

Zhihua Wu<sup>†a</sup>, De Zhao<sup>†b</sup>, Chengyi Hou<sup>a</sup>, Lei Liu<sup>b</sup>, Jianhua Chen<sup>c</sup>, Hui Huang<sup>b</sup>, Qinghong Zhang<sup>a</sup>,  
Yourong Duan<sup>\*b</sup>, Yaogang Li<sup>\*a</sup>, Hongzhi Wang<sup>\*a</sup>

#### Figures

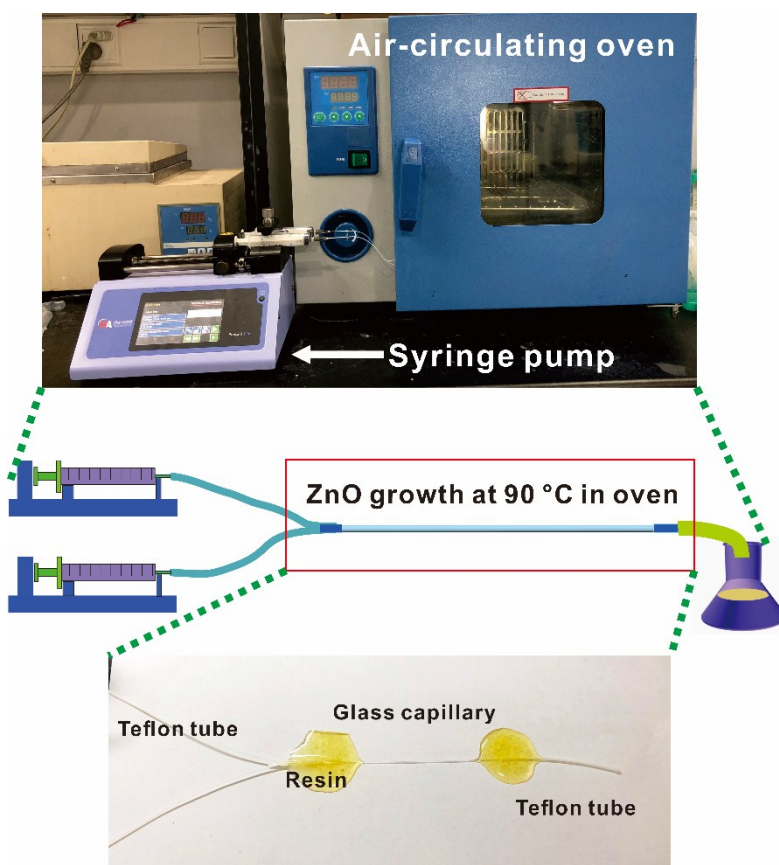

**Fig. S1** Photographs of fabrication process and the microfluidic device. The diameter of the glass capillaries is about 500  $\mu\text{m}$ . The whole length of capillaries is 10 cm, and the available part is 5-8 cm. As shown in Fig. S1, the capillary was placed in air-circulating oven to maintain the reaction temperature at 90°C. Glass capillary was sealed using resin to ensure the airtightness. Besides, ZnO nanorods can be constructed in the innerwall of glass with the capillary diameter of 100-900  $\mu\text{m}$ .

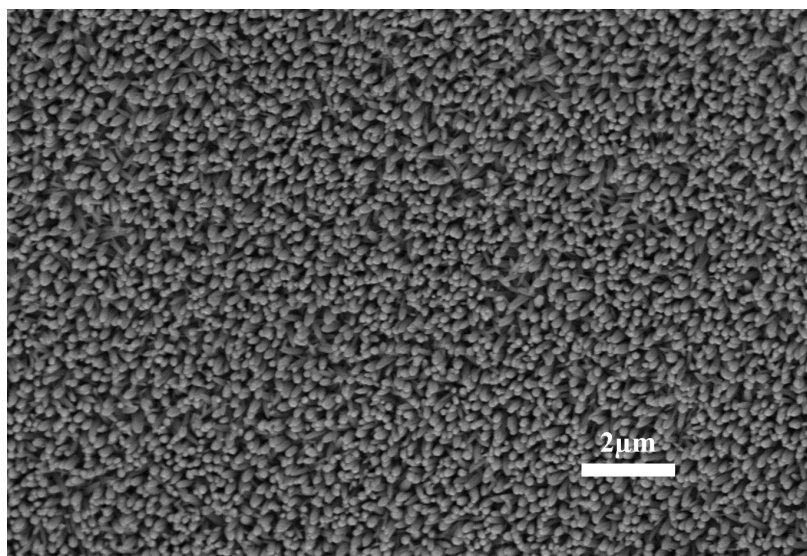

**Fig. S2** Low-magnification SEM image of ZnO-III nanorod arrays.

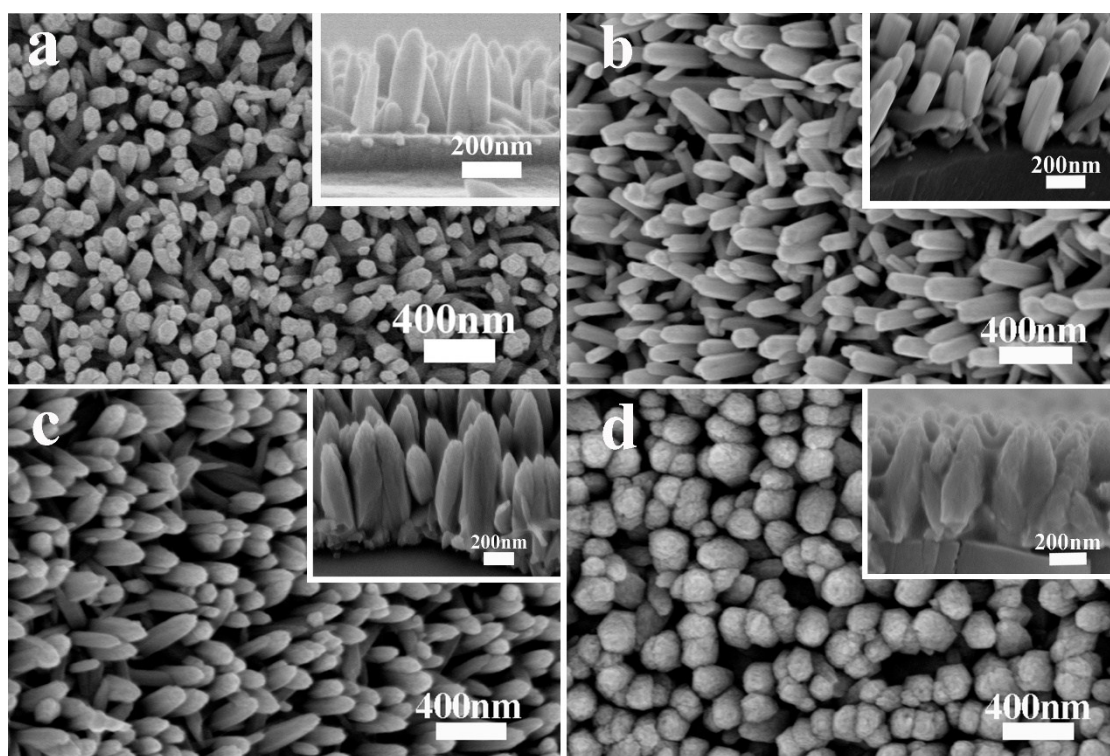

**Fig. S3** SEM images of ZnO nanorods grown in capillaries at 90 °C with the  $\text{Zn}^{2+}$  concentration of 0.10 M, 5 min at the rate of  $0 \mu\text{L}\cdot\text{min}^{-1}$  (a) (ZnO-V), repeat (a) for another 5 min (b) (ZnO-VI), 4 min at the rate of  $25 \mu\text{L}\cdot\text{min}^{-1}$  (c) (ZnO-VII), and 2 min at the rate of  $50 \mu\text{L}\cdot\text{min}^{-1}$  (d) (ZnO-VIII).

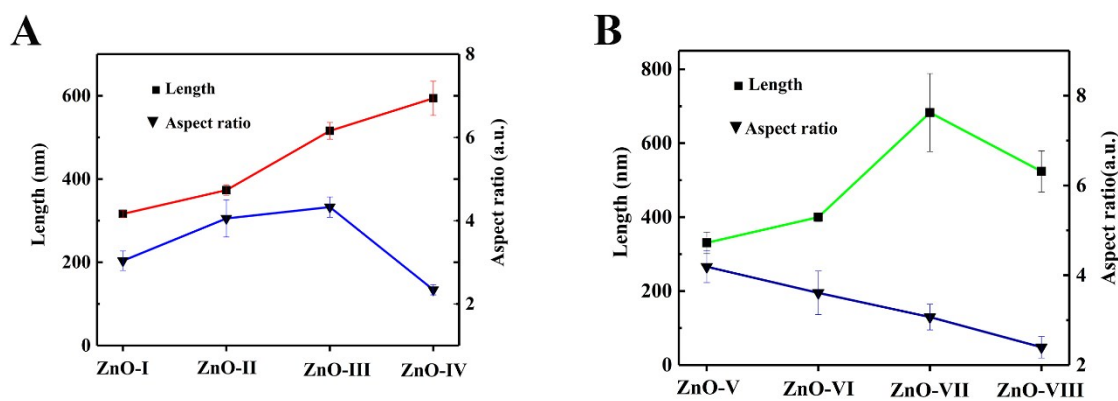

**Fig. S4** Statistics of aspect ratio and length of ZnO nanorods prepared with different reaction solution concentration, (A) 0.05 M (ZnO- I ~ ZnO-IV), (B) 0.10 M (ZnO-V ~ ZnO-VIII).

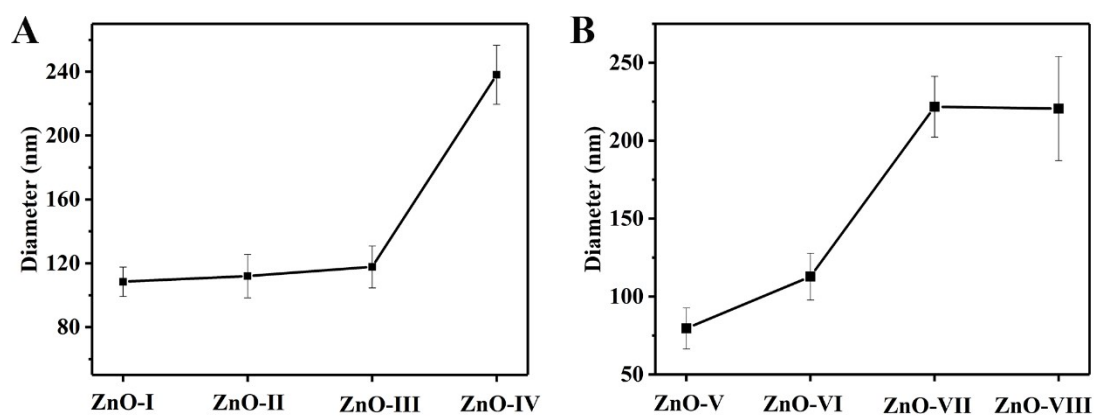

**Fig. S5** Statistics of diameter of ZnO nanorods prepared with different reaction solution concentration, (A) 0.05 M (ZnO- I ~ ZnO-IV), (B) 0.10 M (ZnO-V ~ ZnO-VIII).

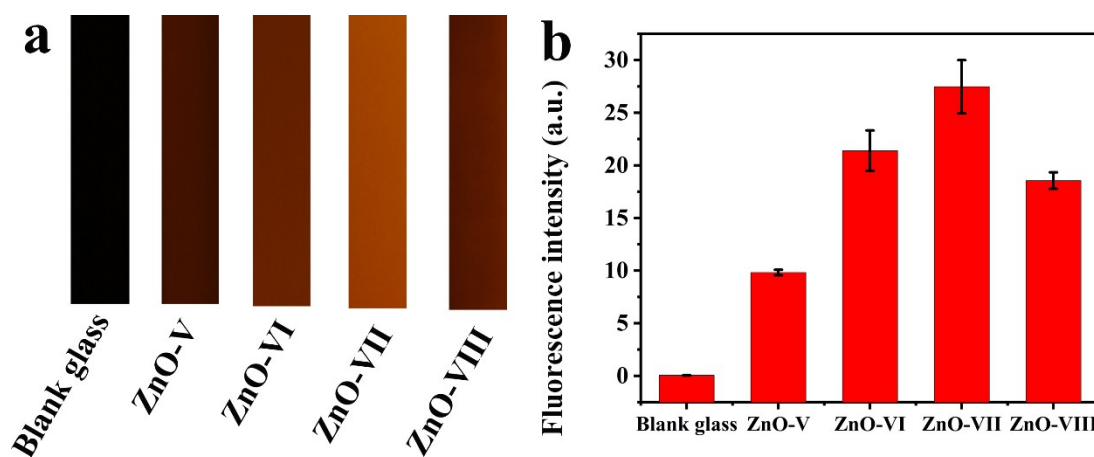

**Fig. S6** Comparison of fluorescent enhancement of ZnO nanorods with  $\text{Zn}^{2+}$  concentration of 0.10 M, (a) Fluorescent images, (b) the corresponding fluorescence intensity comparison of (a).

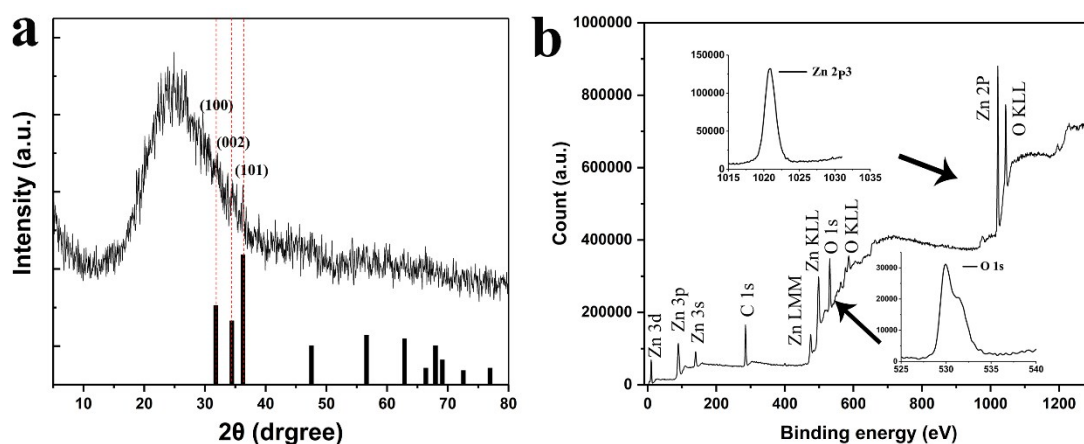

**Fig. S7** (a) Powder-XRD pattern of ZnO nanorods. Due to the high content of glass in powder sample, it shows a broad diffraction peak positioned at 2-theta angles of 25, (b) XPS survey spectrum of ZnO nanorods.

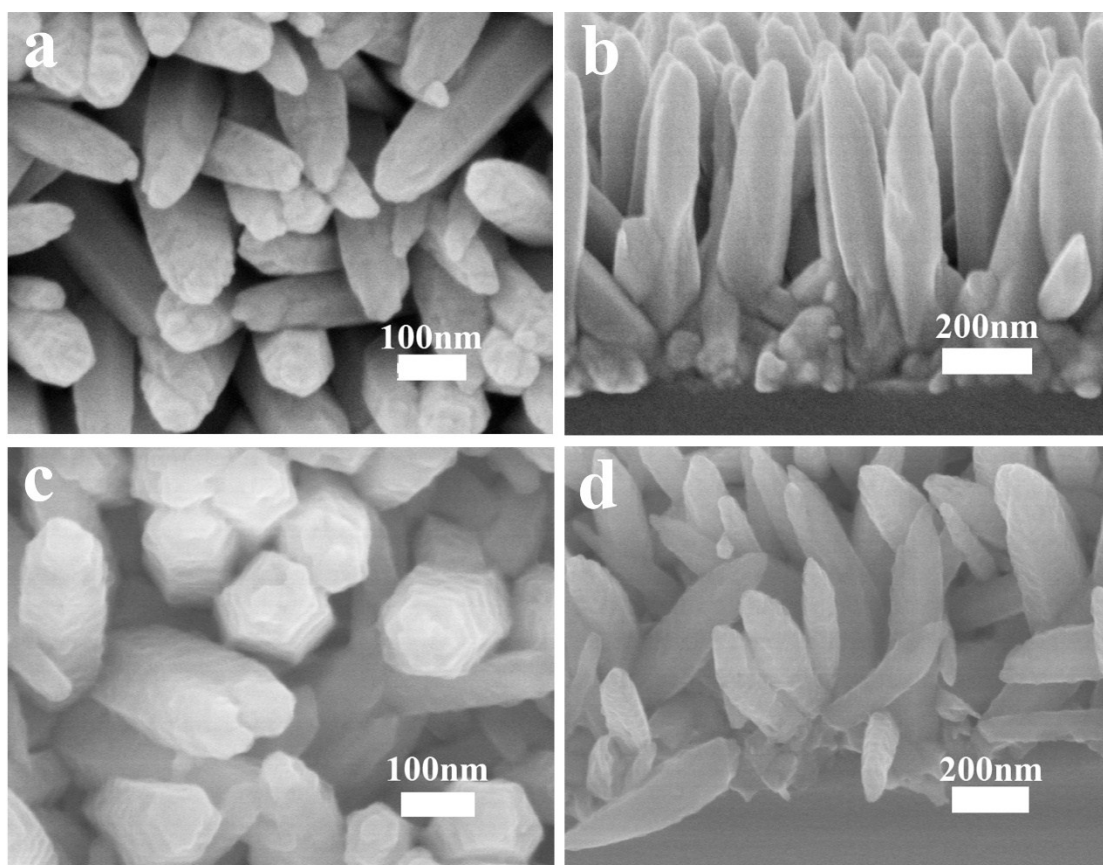

**Fig. S8** Top view and cross-section view of SEM images of ZnO nanorods (reaction solution flowing through the capillary for 4 min at the rate of  $25 \mu\text{L} \cdot \text{min}^{-1}$ ), (a) (b) before PAA modification, (c) (d) PAA modified ZnO nanorods.

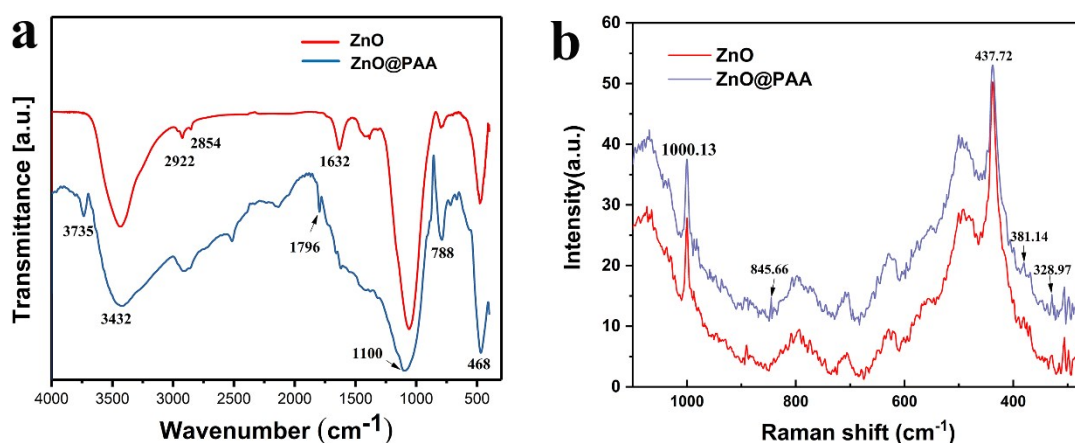

**Fig. S9** Characterization of ZnO nanorods, (a) FTIR spectra of original ZnO and ZnO@PAA, (b) Raman spectrum of ZnO and ZnO@PAA. The characteristic Raman peak of ZnO is located at 437.72 cm<sup>-1</sup>, which is ascribed to E<sub>2H</sub> mode of ZnO. Besides, Raman peaks located at 381.14 and 328.97 cm<sup>-1</sup> can be assigned to the A<sub>1</sub>(TO) and 3E<sub>2H</sub> - E<sub>2L</sub> mode of ZnO (J. Phys. Chem. C 2008, 112, 7332-7336). And the peak centered at 1000.13 cm<sup>-1</sup> could be assigned to  $\delta$ (COH) resulting from ethanolamine. (Carbohydrate research, 1996, 284(2): 145-157; J. Am. Chem. Soc., 1964, 86, 559-564). In the case of ZnO@PAA nanorods, the Raman peak located at 845.66 cm<sup>-1</sup> corresponds to  $\nu$ (C-COO) stretching, which also indicates the successful modification of PAA (Polymer, 1998, 39(2): 267-273).

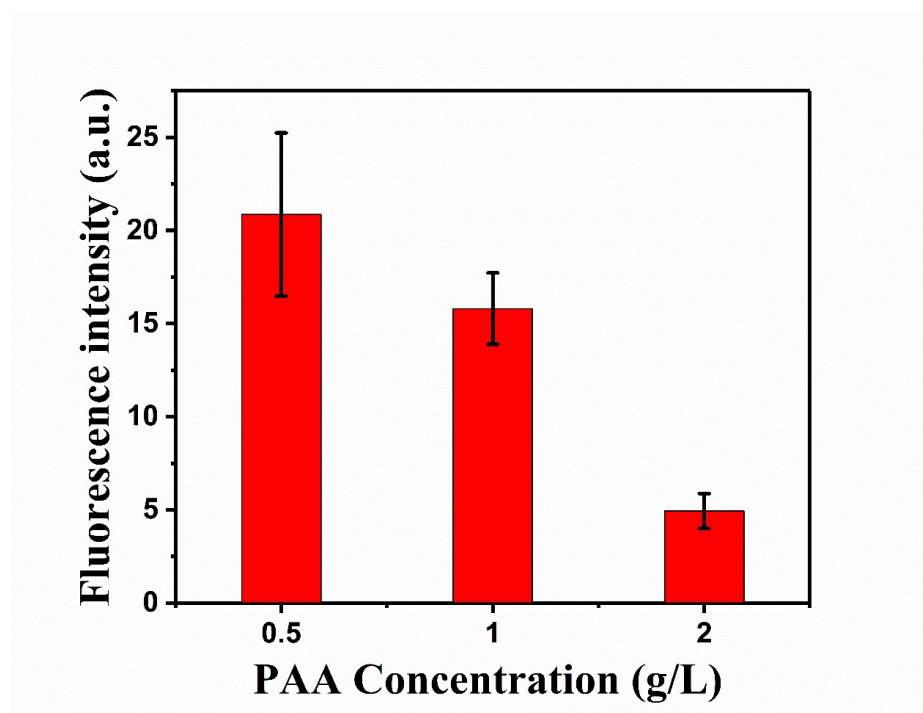

**Fig. S10** Nonspecific protein adsorption on ZnO nanorod array with different contents of PAA coating.

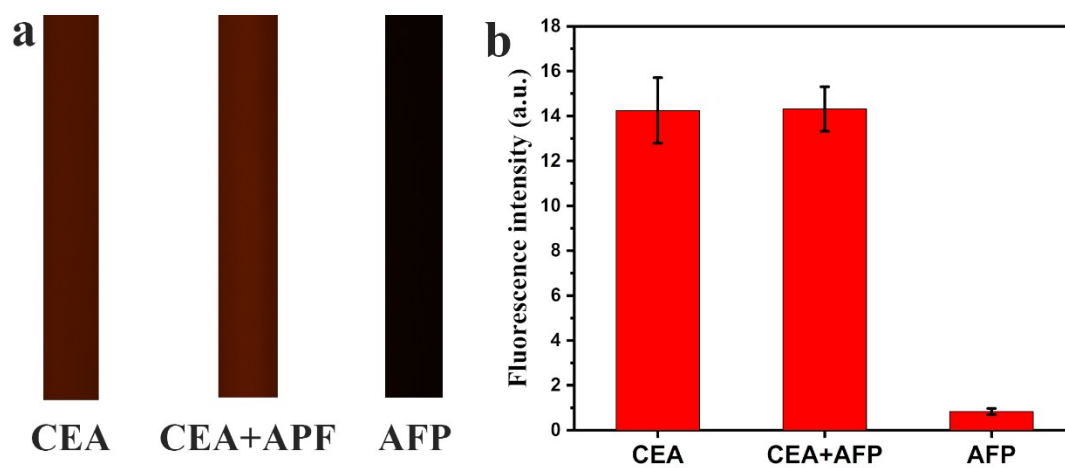

**Fig. S11** Specific detection of CEA (the concentration of CEA and AFP is  $1 \text{ ng} \cdot \text{mL}^{-1}$ ). (a) Fluorescent images of CEA, CEA+AFP, AFP, respectively, (b) Corresponding fluorescent intensity of each group.
